# Supplementary material
Source: PubMed Central journal article supplement (PMC3708311)
Supplement: NIHMS463532-supplement-Supporting_material.pdf [file NIHMS463532-supplement-Supporting_material.pdf]

---

## Supporting Information

### Discovery of Substituted 4-(Pyrazol-4-yl)-phenylbenzodioxane-2-carboxamides as Potent and Highly Selective Rho Kinase (ROCK-II) Inhibitors

Yangbo Feng<sup>1</sup>, Yan Yin<sup>1</sup>, Amiee Weiser<sup>1</sup>, Evelyn Griffin<sup>1</sup>, Michael D. Cameron<sup>1</sup>, Li Lin<sup>1</sup>,  
Claudia Ruiz<sup>1</sup>, Stephan C. Schürer<sup>1</sup>, Toshihiro Inoue<sup>2</sup>, P. Vasanth Rao<sup>2</sup>, Thomas  
Schröter<sup>1</sup>, and Philip LoGrasso<sup>1\*</sup>.

<sup>1</sup> Department of Molecular Therapeutics, and Translational Research Institute,  
The Scripps Research Institute, Florida, 5353 Parkside Dr., Jupiter, FL 33458.

<sup>2</sup> Department of Ophthalmology, Pharmacology, and Cancer Biology,  
Duke University School of Medicine, Durham, NC 27710.

#### Contents

- S2. (1) Synthetic Procedures and Characterization
- S11. (2) ROCK-II modeling and docking
- S15. (3) Pharmacokinetics
- S16. (4) Cytochrome P450 inhibition
- S17. (5) Biological Testing
  - S17. (5a) Screening
  - S21. (5b) Kinase panel screening for **5** at 3  $\mu$ M (Ambit screen):
  - S29 (5c) Counter screening of **5** against a panel of 70 non-kinase enzymes and receptors

---

## (1) Synthetic Procedures and Characterization:

Analytical HPLC data were generated by injecting 5  $\mu\text{L}$  of very dilute sample solution in methanol or acetonitrile to a reverse phase HPLC system run over 14 min (5-95% acetonitrile / water with 0.1% TFA in each solvent). The products were detected by UV in the detection range of 215-310 nm. HRMS (electrospray ionization) experiments were performed with a Thermo Finnigan orbitrap mass analyzer. Data were acquired in the positive ion mode at a resolving power of 100,000 at  $m/z$  400. Calibration was performed with an external calibration mixture immediately prior to analysis. Proton Nuclear magnetic Resonance ( $^1\text{H}$  NMR) spectra were recorded at 400 MHz (Bruker), chemical shifts are reported in ppm downfield ( $\delta$ ) from  $\text{Me}_4\text{Si}$ .

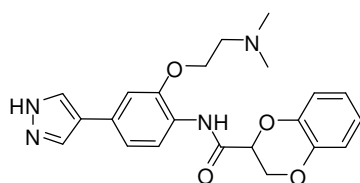

### **Chroman-3-carboxylic acid [2-(2-dimethylamino-ethoxy)-4-(1H-pyrazol-4-yl)-phenyl]-amide\_5 (SR3677).**

#### Step A. 2-(5-bromo-2-nitrophenoxy)-*N,N*-dimethylethanamine (7).

To a solution of 2-(dimethylamino)ethanol (0.610 mL, 6.06 mmol) in THF (25 mL) at 0  $^{\circ}\text{C}$  was added NaH (60% oil dispersion, 0.360 g, 9 mmol). After stirring for 15 min, 4-bromo-2-fluoro-1-nitrobenzene (**6**) (1.32 g, 6.00 mmol) was added and the resulting mixture was allowed to warm to room temperature and stirred for 7 h. The solvent was removed by rotary evaporation and the residue was treated with diethyl ether (50 mL) and an aqueous 0.5 N HCl solution (100 mL). The layers were separated and the aqueous layer was basified with an aqueous saturated  $\text{NaHCO}_3$

---

solution and extracted with ethyl acetate (3 × 50 mL). The combined organic layers were washed with brine (50 mL), dried over Na<sub>2</sub>SO<sub>4</sub>, filtered, and concentrated to give the title compound **7** (1.59 g, 92%). <sup>1</sup>H NMR (CDCl<sub>3</sub>, 400 MHz) δ 7.74 (d, *J* = 8.8 Hz, 1 H), 7.25 (d, *J* = 2.0 Hz, 1 H), 7.17 (dd, *J* = 8.8, 2.0 Hz, 1 H), 4.19 (t, *J* = 5.6 Hz, 2 H), 2.80 (t, *J* = 5.6 Hz, 2 H), 2.35 (s, 6 H). Single peak at 254 nm and 215 nm in analytical HPLC.

Step B. 4-bromo-2-(2-(dimethylamino)ethoxy)aniline (**8**).

To a solution of 2-(5-bromo-2-nitrophenoxy)-N,N-dimethylethanamine (Step A, 1.59 g, 5.50 mmol) in ethanol (50 mL) was added stannous chloride (6.2 g, 27.5 mmol) and the mixture was heated to 70 °C for 2 h. The reaction mixture was diluted with ice water and concentrated by rotary evaporation. An aqueous Na<sub>2</sub>CO<sub>3</sub> solution was added and the aqueous phase was extracted with ethyl acetate (3 × 60 mL). The combined organic layers were washed with brine (50 mL), dried over Na<sub>2</sub>SO<sub>4</sub>, filtered, and concentrated to dryness to afford the title compound **8** (1.30 g, 91%). <sup>1</sup>H NMR (CDCl<sub>3</sub>, 400 MHz) δ 6.90 (m, 2 H), 6.57 (d, *J* = 8.8 Hz, 1 H), 4.07 (t, *J* = 5.6 Hz, 2 H), 3.92 (br s, 2 H), 2.74 (t, *J* = 5.6 Hz, 2 H), 2.33 (s, 6 H). Single peak at 254 nm and 215 nm in analytical HPLC.

Step C. N-(4-bromo-2-(2-(dimethylamino)ethoxy)phenyl)-2,3-dihydrobenzo[b][1,4]dioxine-2-carboxamide **9**.

To a solution of amine **8** (0.1 g, 0.4 mmol), benzodioxane-2-carboxylic acid (1.1 equiv), and DIEA (3 equiv) in DMF was added HATU (0.18 g, 0.5 mmol) and the solution was gently stirred at 23 °C for 2h. After the solvent was removed by rotary

---

evaporation, the residue was suspended in ethyl acetate, washed with brine (2 x), saturated NaHCO<sub>3</sub> (2 x), brine (2 x), dried over Na<sub>2</sub>SO<sub>4</sub>, and evaporated to give the crude bromide **9** (0.13 g, 0.3 mmol, 75%), which was used directly in the next step without further purification.

Step D. chroman-3-carboxylic acid [2-(2-dimethylamino-ethoxy)-4-(1H-pyrazol-4-yl)-phenyl]-amide.

Pd[P(Ph)<sub>3</sub>]<sub>4</sub> (15%) was added to a degassed (using argon) solution of **9** (0.13 g, 0.3 mmol), 1*H*-4-pyrazoleboronic acid pinacol ester (2 equiv), and K<sub>2</sub>CO<sub>3</sub> (5 equiv) in dioxane/H<sub>2</sub>O (4:1 by volume). After the solution was sealed in a high-pressure reactor, the suspension was stirred at 90-100 °C for 4 h, at which the Suzuki coupling was complete based on LC-MS analysis. After removing the solvent by rotary evaporation, the resulting residue was purified by preparative reverse phase HPLC to give compound **5 (SR3677)** as a white solid (0.066 g, 35%). <sup>1</sup>H NMR (DMSO-d<sub>6</sub>, 400 MHz), δ: 9.73 (b, 1H), 9.23 (s, 1H), 8.07 (s, 2H), 7.88 (d, *J* = 8.4 Hz, 1H), 7.34 (d, *J* = 1.6 Hz, 1H), 7.25 (dd, *J* = 1.6 Hz, *J* = 4.4 Hz, 1H), 7.09 (m, 1H), 6.93 (m, 3H), 5.09 (dd, *J* = 2.8 Hz, *J* = 5.6 Hz, 1H), 4.46 (dd, *J* = 2.8 Hz, *J* = 10.6 Hz, 1H), 4.37 (dd, *J* = 6.0 Hz, *J* = 11.6 Hz, 1H), 3.55 (m, 2H), 2.92 (m, 2H), 2.89 (s, 6H). Single peak in analytical HPLC trace; HRMS, MH<sup>+</sup> calcd for C<sub>22</sub>H<sub>24</sub>N<sub>4</sub>O<sub>4</sub>: 409.1876, obtained: 409.1860.

The analytical HPLC trace of SR3677 (**5**):

Data File name: C:\HPCHEM\1\DATA\SIG10001.D  
Method name: C:\HPCHEM\1\METHODS\TON1.M  
Method last modified: 5/2/2008 , 1:36:19 PM  
File: C:\HPCHEM\1\DATA\SIG10001.D  
Sample: sr3677  
Injection date: 7/23/2008

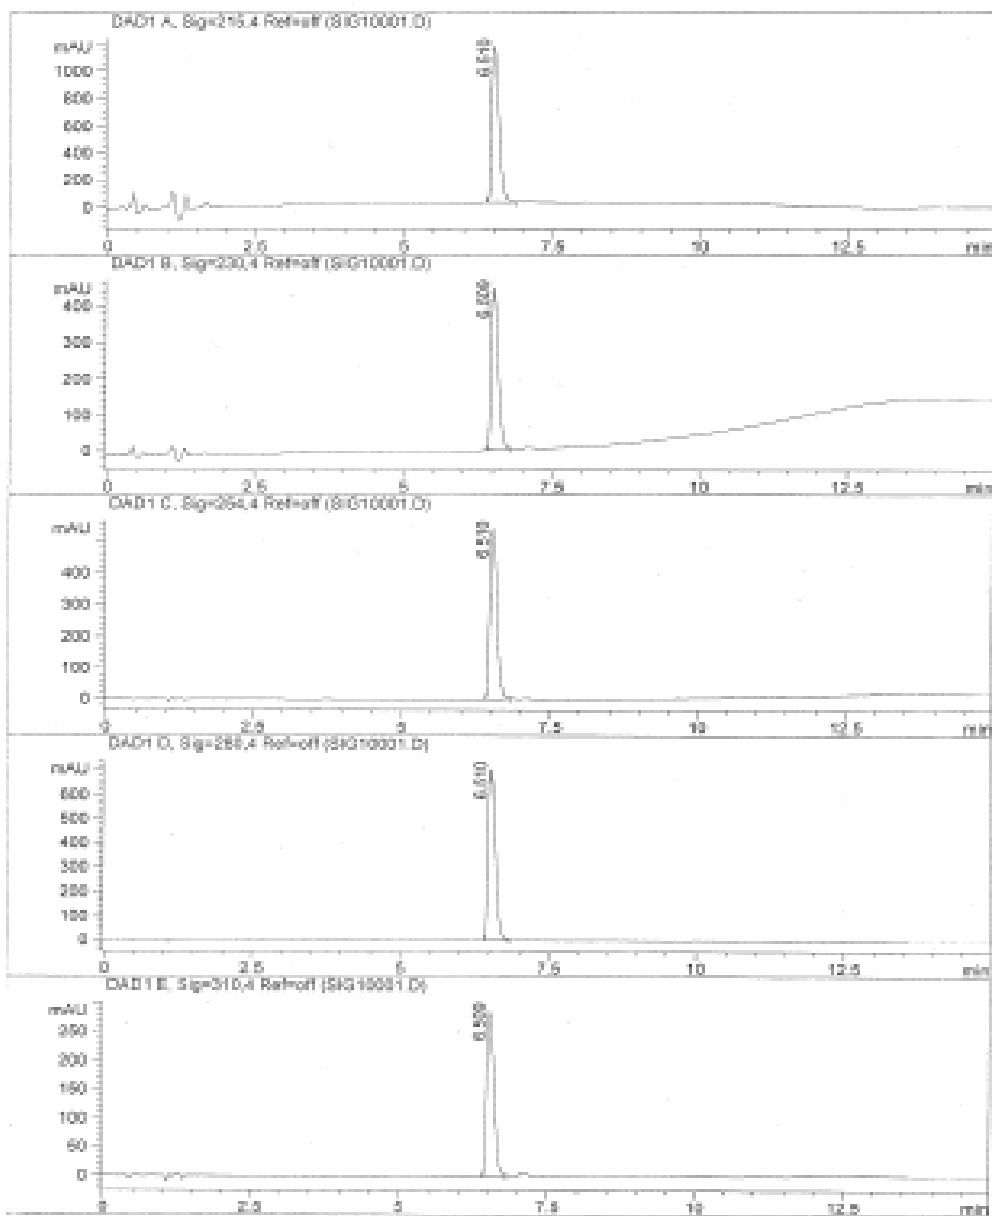

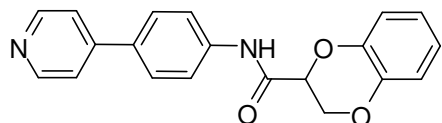

**N-(4-(pyridin-4-yl)phenyl)-2,3-dihydrobenzo[b][1,4]dioxine-2-carboxamide (2).**

Similar procedures as in the synthesis of SR3677 were used to prepare this titled compound.  $^1\text{H}$  NMR (DMSO, 400 MHz)  $\delta$  4.35-4.42 (dd,  $J = 5.6, 12.0$  Hz, 1H), 4.47 (dd,  $J = 2.8, 12.0$  Hz, 1H), 5.04 (dd,  $J = 3.2, 5.6$  Hz, 1H), 6.84-6.93 (m, 3H), 7.04-7.07 (m, 1H), 7.86 (d,  $J = 8.8$  Hz, 2H), 7.99 (d,  $J = 8.8$  Hz, 2H), 8.12 (d,  $J = 6.8$  Hz, 2H), 8.80 (d,  $J = 6.8$  Hz, 2H), 10.4 (s, 1H); Single peak in analytical HPLC; HRMS,  $\text{MH}^+$ : calcd for  $\text{C}_{20}\text{H}_{16}\text{N}_2\text{O}_3$ : 333.1239, obtained: 333.1225.

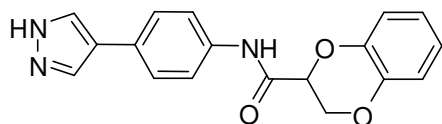

**N-(4-(1H-pyrazol-4-yl)phenyl)-2,3-dihydrobenzo[b][1,4]dioxine-2-carboxamide (3).**

Similar procedures as in the synthesis of SR3677 were used to prepare this titled compound.  $^1\text{H}$  NMR (DMSO, 400 MHz)  $\delta$  4.30-4.40 (dd,  $J = 5.6, 12.0$  Hz, 1H), 4.47 (dd,  $J = 2.8, 12.0$  Hz, 1H), 4.96 (dd,  $J = 2.4, 5.6$  Hz, 1H), 6.83-6.92 (m, 3H), 7.02-7.06 (m, 1H), 7.56 (d,  $J = 8.8$  Hz, 2H), 7.62 (dd,  $J = 2.0, 6.8$  Hz, 2H), 8.01 (m, 2H), 10.10 (s, 1H), 13.0 (b, 1H); Single peak in analytical HPLC;  $\text{MH}^+$ : calcd for  $\text{C}_{18}\text{H}_{15}\text{N}_3\text{O}_3$ : 322.1192, obtained: 322.1180.

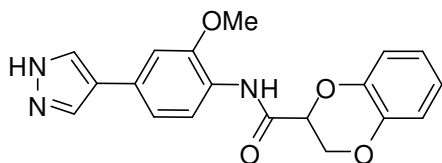

---

**N-(2-methoxy-4-(1H-pyrazol-4-yl)phenyl)-2,3-dihydrobenzo[b][1,4]dioxine-2-carboxamide (4).**

Similar procedures as in the synthesis of SR3677 were used to prepare this titled compound. <sup>1</sup>H NMR (DMSO, 400 MHz) δ 3.88 (s, 3H), 4.41 (d, *J* = 4.0 Hz, 2H), 5.12 (t, *J* = 4.0 Hz, 1H), 6.86-6.95 (m, 3H), 7.06 (m, 1H), 7.52-7.65 (m, 2H), 8.01 (d, *J* = 8.4 Hz, 1H), 8.09 (b, 2H), 9.15 (s, 1H); Single peak in analytical HPLC; HRMS, MH<sup>+</sup>: calcd for C<sub>19</sub>H<sub>17</sub>N<sub>3</sub>O<sub>4</sub>: 352.1297, obtained: 352.1288.

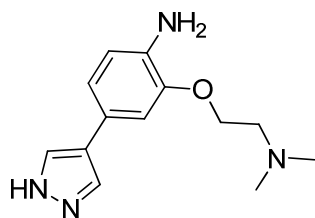

**2-(2-(dimethylamino)ethoxy)-4-(1H-pyrazol-4-yl)aniline (10).**

Similar procedures as in the synthesis of SR3677 were used to prepare this titled compound. <sup>1</sup>H NMR (DMSO, 400 MHz) δ 7.99 (s, 2H), 7.25 (s, 1H), 7.15-7.13 (m, 1H), 6.97-6.95 (m, 1H), 4.40 (t, *J*=4.8 Hz, 2H), 3.56 (t, *J*=4.8 Hz, 2H), 2.91 (s, 3H); Single peak in analytical HPLC; HRMS, MH<sup>+</sup> calcd for C<sub>13</sub>H<sub>18</sub>N<sub>4</sub>O:247.1559, obtained: 247.1546.

**The analytic HPLC trace of compound 10**

Data File name: C:\HPCHEM\1\DATA\FANG\032-1701.D  
Method name: C:\HPCHEM\1\METHODS\TOM1.M  
Method last modified: 6/3/2008 , 10:55:14->  
File: C:\HPCHEM\1\DATA\FANG\032-170->  
Sample: sr5781t32  
Injection date: 7/21/2008

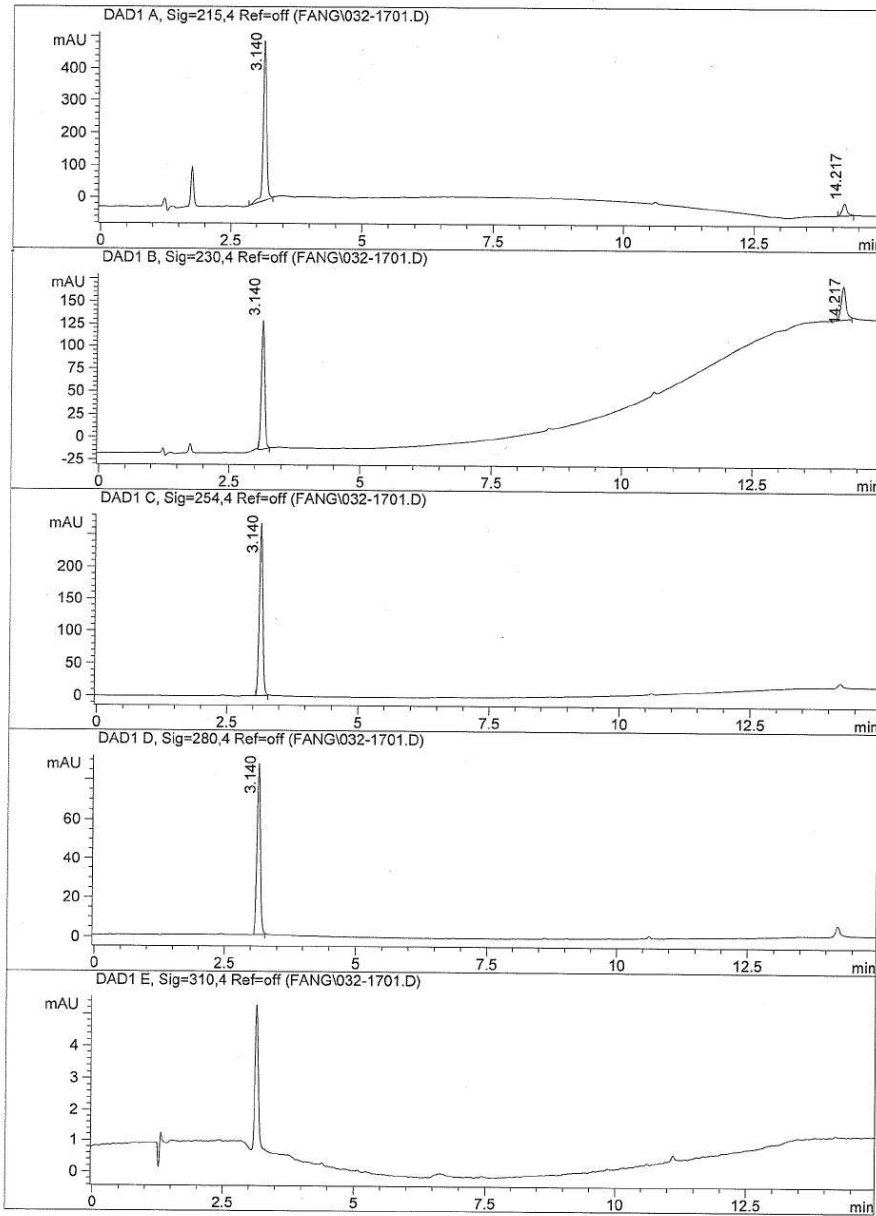

created on:7/21/2008

2:15:59 PM

Page 1 of 3



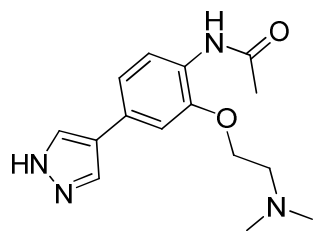

**N-(2-(2-(dimethylamino)ethoxy)-4-(1H-pyrazol-4-yl)phenyl)acetamide (11).**

Similar procedures as in the synthesis of SR3677 were used to prepare this titled compound.  $^1\text{H}$  NMR (DMSO, 400 MHz)  $\delta$  9.82 (br, 1H), 9.07-9.06 (m, 1H), 8.04 (s, 2H), 7.87-7.84 (m, 1H), 7.31-7.30 (m, 1H), 7.21-7.19 (m, 1H), 4.43 (t,  $J=4.8$  Hz, 2H), 3.60-3.59 (m, 2H), 2.93 (d,  $J=4.8$  Hz, 6H), 2.10 (s, 3H); Single peak in analytical HPLC; HRMS,  $\text{MH}^+$ : calcd for  $\text{C}_{15}\text{H}_{20}\text{N}_4\text{O}_2$ : 289.1665, obtained: 289.1651.

**The analytical HPLC trace of compound 11:**

Data File name: C:\HPCHEM\1\DATA\FANG\002-0201.D  
Method name: C:\HPCHEM\1\METHODS\TOM1.M  
Method last modified: 6/3/2008 , 10:55:14->  
File: C:\HPCHEM\1\DATA\FANG\002-020->  
Sample: yy022402t2  
Injection date: 7/15/2008

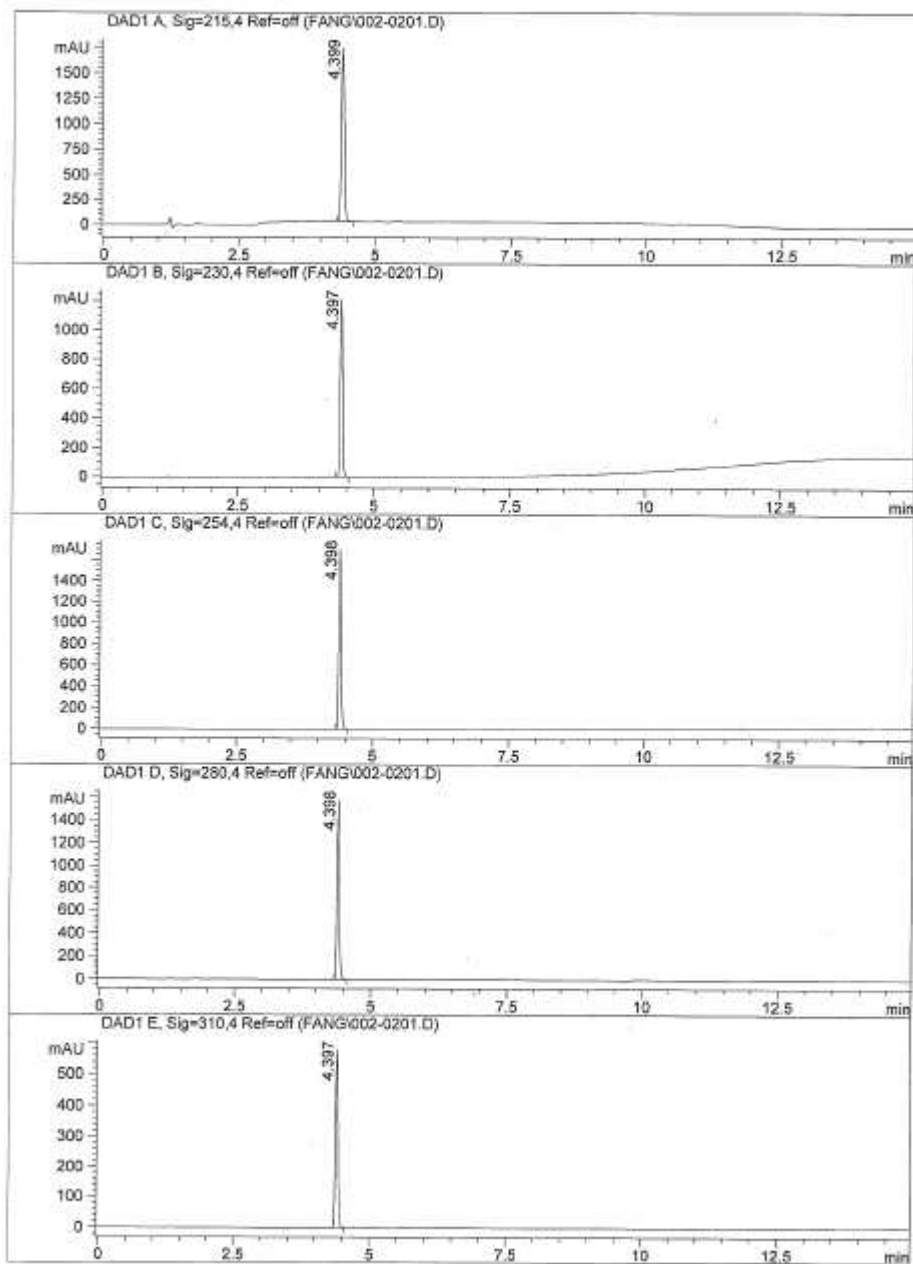

created on:7/15/2008

3:02:05 PM

Page 1 of 3

---

## (2) ROCK-II modeling and docking

After comparing the available experimental co-crystal and apo-crystal structures for Rho kinase with emphasis on the flexibility of the P loop we built a model of human ROCK-II based on the template of chain A of the human ROCK-I co-crystal structure with Y27632 (2ETR) using the automated STRUCTFAST method (85 % identity based on 395 aligned residues; ROCK-II sequence 22-416); the only sequence difference between ROCK-II and ROCK-I around 10Å of the Y27632 ligand are ROCK-I THR365 vs. ROCK-II Ser381 and ROCK-I Leu371 vs. ROCK2 ILE387.

Into the single chain ROCK-II model, which does not contain any water molecules, the original co-crystal ligand Y27632 was cloned followed by optimization of the hydrogen bonds. This complex was then minimized to 0.1 RMSG using the OPLS force field with the GB/SA solvent model around 8Å of the ligand and a 6Å shell with an increased force constant. The energy minimized structure was used to generate a docking grid of 18Å length along the ligand Y27632.

Compound **5** (SR3677), which has only one stable tautomer, was protonated at pH 7 at the dimethylaminoethoxy moiety and for both enantiomers two 3D low energy ring conformations with equatorial and axial substitution at the dihydrobenzodioxine moiety respectively were generated using LigPrep from Schrodinger (Figure S1). The two different ring starting conformations are required to sample the conformational space because Glide's conformation generator or a force field minimization would not transform one into the other conformation. The prepared ligand structures were flexibly docked into the ROCK-II binding site using Glide from Schrodinger with both the SP and the XP scoring functions. Interestingly, different docking results were obtained

---

depending on the ligand starting conformation with much better docking scores and energies for the axial (SR3677-(*S*)\_ax) compared to the equatorial (SR3677-(*S*)\_eq) starting ring conformation. The differences in docking results (in terms of score and energy) were larger for the XP method. The best poses obtained by the SP and XP method starting from the axial ring conformation are almost identical. Starting from the equatorial conformation different poses are obtained depending on the scoring function; using the XP method the dihydrobenzodioxine moiety orients closer towards the P-loop (same pose derived from the axial starting conformation), but with a distorted (non-planar) amide bond (this is because the XP method better accounts for hydrophobic interaction, which are important in this case, but the equatorial conformation does not fit – without distortion – into this angled orientation); with the SP method a more linear pose is obtained with no interaction in the P-loop. Although the docking poses, scores, and energies of the (*R*) and (*S*) isomers do not vary much, in case of the axial starting conformation the (*S*) isomer is preferred slightly and in case of the equatorial conformation the (*R*) isomer. Overall better and more consistent results are obtained from the axial ring conformation (SR3677-(*S*)\_ax) and the best pose (of the (*S*) isomer) is shown in figure 1 and a 2D representation is shown in figure S2 below.

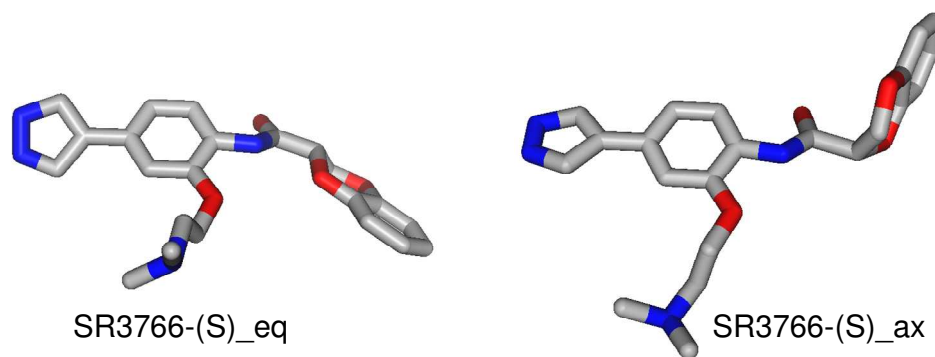

**Figure S1.** Starting ring conformations of **5** (SR3677) that were used for flexible docking into the ROCK-II model (depicted with Marvin Space).

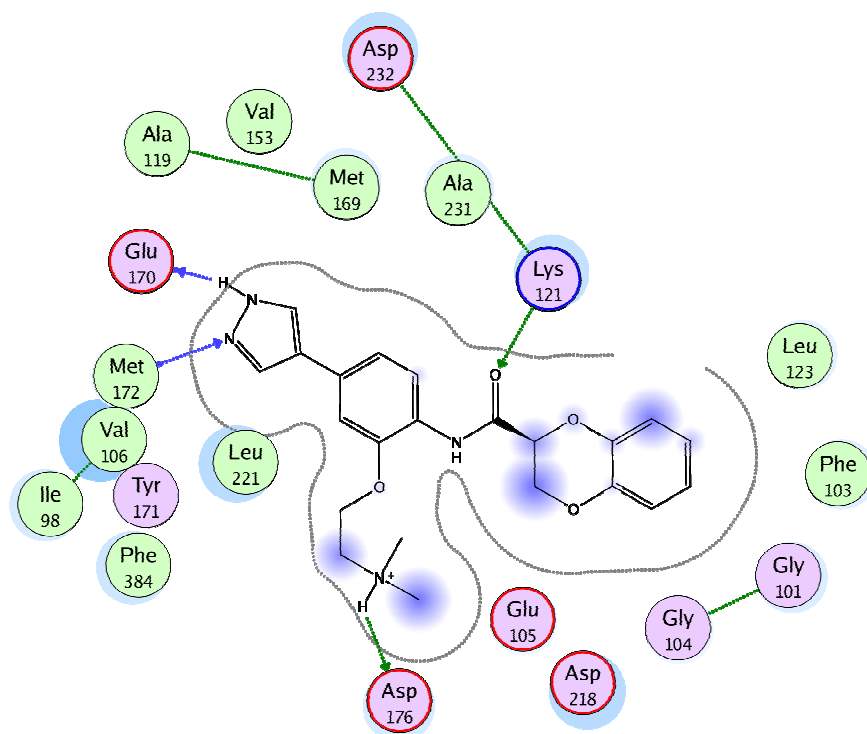

**Figure S2.** 2D representation of the binding mode of **5** (SR3677) in ROCK-II (residues around 5A of the ligand are shown, prepared with MOE).

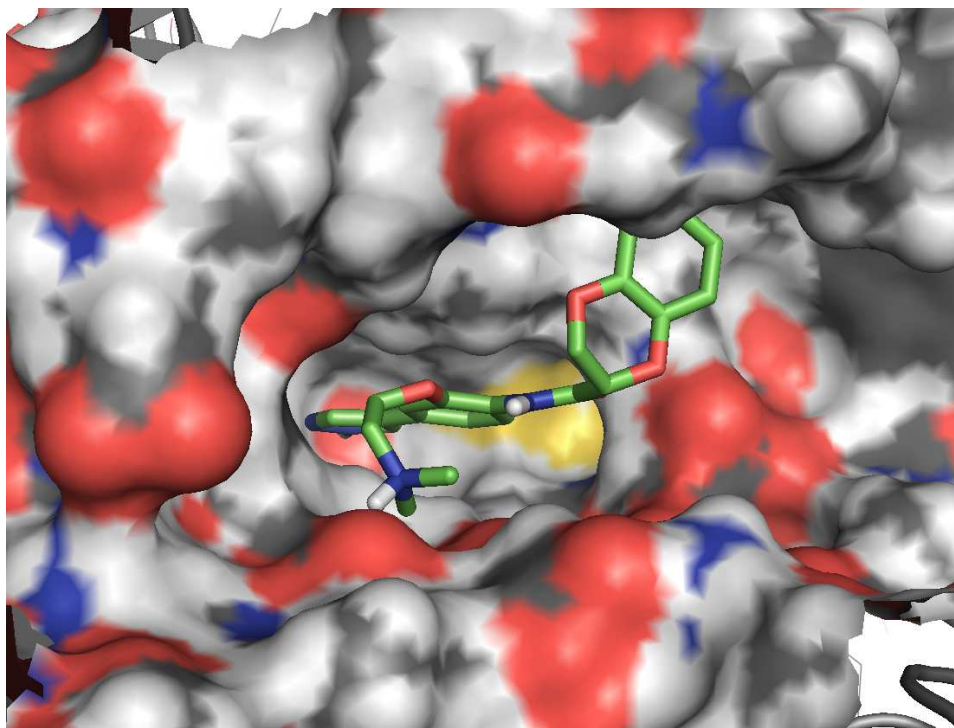

**Figure S3.** Surface representation of the binding pose of **5** (SR3677) in ROCK-II; note the hydrophobic pocket around the dihydrobenzodioxine moiety (figure prepared with PyMOL)

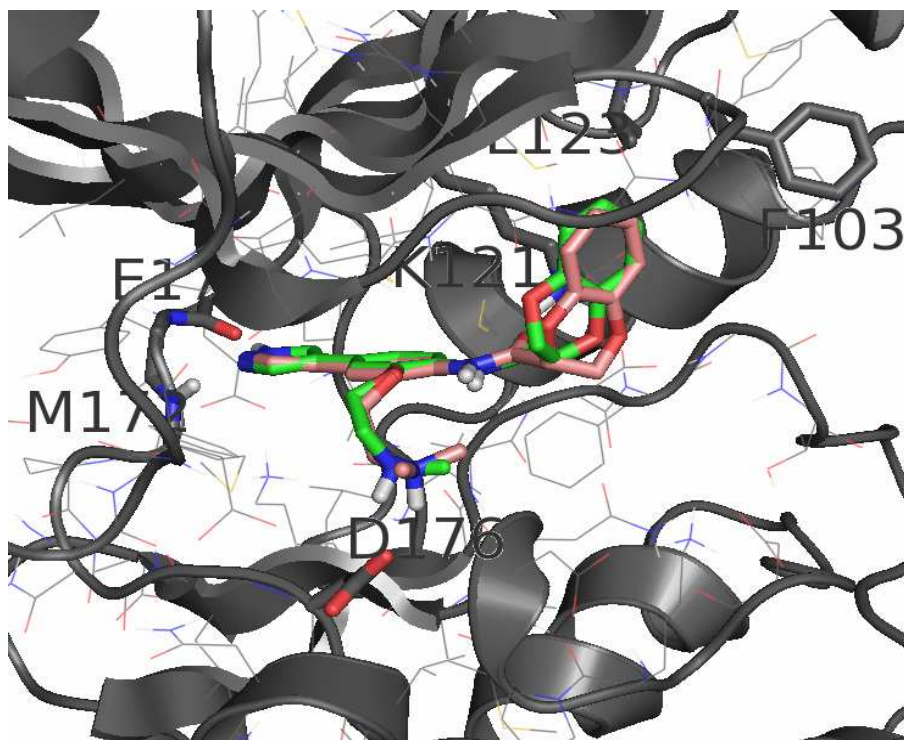

**Figure S4.** The docking of both the “S” (green) and the “R” (pink) enantiomers of **5** (SR3677) to ROCK-II (figure prepared with PyMOL).

### (3) Pharmacokinetics

Pharmacokinetics studies were conducted in Sprague Dawley rats. The compound was formulated in a generic formulation at 1 mg/mL (e.g. 10:10:80, DMSO: tween 80: water, v:v:v) and dosed at 1 mg/kg intravenous into the femoral vein or 2 mg/kg by oral gavage. Blood was obtained at t = 5 min, 15 min, 30 min, 1 hr, 2 hr, 4 hr, 6 hr, and 8 hr. Blood was collected into EDTA containing tubes and plasma was generated by standard centrifugation methods. All procedures and handling were according to standard operating procedures approved by the IACUC at Scripps Florida.

---

In order to assess in vivo pharmacokinetic parameters an LC-MS/MS bioanalytical method was developed where 25  $\mu$ L of plasma was treated with 125  $\mu$ L of acetonitrile containing an internal standard in a Millipore Multiscreen Solvinter 0.45 micron low binding PTFE hydrophilic filter plate (#MSRLN0450) and allowed to shake at room temperature for five minutes. The plate was then centrifuged for 5 minutes at 4000 rpm in a tabletop centrifuge and the filtrate was collected in a polypropylene capture plate. The filtrate (10  $\mu$ L) is injected using an Agilent 1200 HPLC equipped with a Thermo Betasil C18 HPLC column 5  $\mu$ m (50 x 2.1 mm) # 70105-052130. Mobile Phase A was water with 0.1% formic acid. Mobile Phase B was acetonitrile with 0.1% formic acid. Flow rate was 375  $\mu$ L/min using a gradient of 90% A/10% B from 0 – 0.5 min, ramped to 5%A/95%B at 2 min, held at 5%A/95%B until 3.0 min, ramped to 90% A/10% B at 4 min, and held at 90% A/10% B until 7 min.

An API Sciex 4000 equipped with a turbo ion spray source was used for all analytical measurements. MRM methods were developed in positive ion mode. Peak areas of the analyte ion were measured against the peak areas of the internal standard. Data was fit using WinNonLin using an IV bolus model.

#### **(4) Cytochrome P450 inhibition**

Cytochrome P450 inhibition for four major isoforms are evaluated using a cocktail inhibition assay where the metabolism of specific marker substrates (CYP1A2 phenacetin demethylation to acetaminophen; CYP2C9, tolbutamide hydroxylation to hydroxytolbutamide; CYP2D6, bufuralol hydroxylation to 4'-Hydroxybufuralol; and



---

CYP3A4, midazolam hydroxylation to 1'-Hydroxymidazolam) in the presence or absence of 10  $\mu$ M probe compound is evaluated. The concentration of each marker substrate is approximately its  $K_m$  value. Conditions were similar to those described by Tesino and Patonay<sup>1</sup> except 2C19 was not evaluated as we found that stock solutions of the 2C19 probe substrate, omeprazole, had poor stability. Specific inhibitors for each isoform are included in each run to validate the system.

## **(5) Biological Testing**

### **(5a) Screening**

All experiments were performed in Greiner FIA black 384-well low volume plates. All active enzymes except ROCK-II 1-543, which was cloned and purified as described earlier (Schröter, T., et al., *Comparison of Miniaturized Time-Resolved Fluorescence Resonance Energy Transfer and Enzyme-Coupled Luciferase High-Throughput Screening Assays to Discover Inhibitors of Rho-Kinase II (ROCK-II)*. J. Biomol. Screen, 2008. **13**: p. 40-53.), were purchased from Upstate (now part of Milipore). Test compounds were dispensed in a 90% DMSO/10% water mixture using a 384 head offline Pintool system (GNF Systems)

### **ROCK-I/II assay**

Assays were performed using the STK2 kinase system from Cisbio. 5  $\mu$ l mixture of a 1  $\mu$ M STK2 substrate and ATP (ROCK-I: 4  $\mu$ M; ROCK-II: 20  $\mu$ M) in STK-buffer was added to the wells using a BioRAPTR FRD™ Workstation (Aurora Discovery). 20nl of test compounds was dispensed. Reaction was started by addition of 5  $\mu$ l of 2.5 nM

---

ROCK-I (Upstate #14-601) or 0.5 nM ROCK-II in STK-buffer. After 4 h at RT the reaction was stopped by addition of 10  $\mu$ l of 1x antibody and 62.5 nM Sa-XL in detection buffer. After 1 h at RT the plates were read on the Viewlux in HTRF mode.

### **PKA assay**

5  $\mu$ l mixture of a 60  $\mu$ M kemptide and 20  $\mu$ M ATP in Kinase buffer (50 mM Hepes pH 7.3, 10 mM MgCl<sub>2</sub>, 0.1 % BSA, 2 mM DTT) was added to the wells using a BioRAPTR FRD™ Workstation (Aurora Discovery). 20 nl of test compounds was dispensed. Reaction was started by addition of 5  $\mu$ l of 0.5 nM PKA (Upstate #14-440) in Kinase buffer (5  $\mu$ l of kinase buffer for high wells). After 70 min at RT the reaction was stopped by addition of 10  $\mu$ l Kinase-Glo reagent and plate was read after 10 min incubation time at RT on the Viewlux in luminescence mode.

### **MRCK assay**

$K_m$  for ATP and S6-peptide (LCB-AKRRRLSSLRA-NH<sub>2</sub>) were determined by titration various concentration of ATP versus a constant concentration of peptide and vice versa using radioactive filter binding assays. S6-peptide, MRCK and ATP were mixed and reaction was started by addition of ATP and 1 uCi of <sup>33</sup>P-ATP/data point. After indicated time points aliquots were removed and reaction was stopped by 1 volume of 100 mM EDTA and 15 mM Ppi. Reaction was transferred to Millipore HTS PH plates and incubated for 5 min at RT, washed 5 times with 100 mM phosphoric acid (1.15 %). 50 ul/well scintillation cocktail was added and incorporation of radioactive phosphate was measured. For determination of IC<sub>50</sub>s the determined biochemical parameters were used in a Kinase-Glo assay. As a final condition 5  $\mu$ l mixture of a 40  $\mu$ M S6-peptide (LCB-AKRRRLSSLRA-NH<sub>2</sub>) and 10  $\mu$ M ATP in Kinase buffer (50 mM

---

Hepes pH 7.3, 10 mM MgCl<sub>2</sub>, 0.1 % BSA, 2 mM DTT) was added to the wells using a BioRAPTR FRD™ Workstation (Aurora Discovery). 20 nl of test compounds was dispensed. Reaction was started by addition of 5 µl of 12 nM MRCK (Upstate #14-691) in Kinase buffer (5 µl of kinase buffer for high wells). After 75 min at RT the reaction was stopped by addition of 10 µl Kinase-Glo reagent and plate was read after 10 min incubation time at RT on the Viewlux in luminescence mode.

### **AKT1 assay**

A 6 µl mixture of a 1 µM S6-peptide (LCB-AKRRRLSSLRA-NH<sub>2</sub>) and 80 µM ATP in Kinase buffer (50 mM Hepes pH 7.3, 10 mM MgCl<sub>2</sub>, 0.1 % BSA, 2 mM DTT) was added to the wells using a BioRAPTR FRD™ Workstation (Aurora Discovery). 20 nl of test compounds was dispensed. Reaction was started by addition of 6 µl of 0.5 nM AKT1 (Upstate #14-276) in Kinase buffer. After 55 min at RT the reaction was stopped with a 8 µl mixture of 187.5 nM StreptavidinXL665 (Cisbio) and 2.5 ng of custom Eu<sup>3+</sup> Cryptate labeled (Cisbio, Cryptate/Antibody 4.17) phospho S6 peptide antibody (Cell Signaling # 2211) in Quench buffer (31.25 mM Hepes pH 7.5, 312.5 mM KF and 187.5 mM EDTA). After 1 h incubation at RT the plate was measured on the Viewlux in HTRF mode.

### **JNK assays:**

Enzyme inhibition studies were performed in 384-well polystyrene HTRF plates (Grainier). For JNK3 incubations were performed for 15 min at ambient temperature (~22 °C) with, 0.2 µM biotinylated Flag-ATF2, 1 µM ATP, 0.3 nM activated JNK3α1 (with a control in the absence of kinase to determine the basal signal) For p38 incubations were performed for 30 min at ambient temperature (~22 °C) with, 0.4 µM

---

biotinylated Flag-ATF2, 10  $\mu$ M ATP, 0.125 nM activated p38 (with a control in the absence of kinase to determine the basal signal). The reactions were carried out in 10 $\mu$ l volumes containing the final buffer concentrations; 50 mM Hepes pH 7.0, 2.5 mM MgCl<sub>2</sub>, 0.1 mg/ml bovine serum albumin, 1 mM DL-dithiothreitol, 0.01% Triton X-100 and 5% DMSO. A 10-point titration of all compounds was carried out in 3-fold dilutions from 2  $\mu$ M – 10 pM. After the allotted time the kinase reaction was terminated by the addition 10 $\mu$ l of quenching solution (50 mM Hepes, pH 7.0, with 14 mM EDTA, 0.01% Triton X-100, 200 mM KF). The detection reagents, streptavidin-xl-APC (400nM) and europium cryptate-labeled rabbit polyclonal anti-phospho-ATF2 (0.43 ng/well) were purchased from CisBio. The HTRF signal was detected using a viewlux plate reader (PerkinElmer) 1 hr post-quenching. IC<sub>50</sub> values were determined by fitting the data to the equation for a four-parameter logistic.

### **Target modulation using the LI-COR Odyssey system**

A7r5 cells were plated at 5000 cells/well in a 96-well Packard View Plate (Perkin Elmer) in DMEM +10 % FBS. After allowing attachment overnight, cells were serum starved for 4 h and treated with inhibitor in 0.25% DMSO final concentration for 1 h at 37 °C. Cells were then treated with 10  $\mu$ M LPA for 10 min. Following treatment, cells were immediately fixed with 4% paraformaldehyde for 30 minutes. After a brief wash in 0.1 M glycine, cells were permeabilized in 0.2% Triton X for 10 minutes. Cells were then washed once in PBS and blocked in LI-COR blocking buffer (LI-COR Biosciences) for 1 h at 25 °C. Cells were probed for either phosphorylated myosin light chain 20 using 55 ng/mL primary rabbit antibody, total myosin light chain using 525 ng/mL primary rabbit

antibody or for  $\alpha$ -tubulin using 1  $\mu$ g/mL primary mouse antibody, and incubated overnight at 4 °C. Following three washes, cells were probed with goat-anti-rabbit or goat-anti-mouse IR800 antibody (2  $\mu$ g/mL in LI-COR block + 0.025% Tween-20) for 1 h at 25 °C. Nuclei were stained with TO-PRO-3 iodide (642/661) (1:4000) for 20 minutes, washed twice in PBS/0.05% Tween-20 and read with an Odyssey Infrared Imaging System (LI-COR Biosciences).

**(5b) Results from kinase panel screening for 3677 at 3  $\mu$ M (Ambit screen):\***

| kinase      | Percent Control | Conc. (nM) | kinase | Percent Control | Conc. (nM) |
|-------------|-----------------|------------|--------|-----------------|------------|
| AAK1        | No hit          | 3000       | CDC2L1 | No hit          | 3000       |
| ABL1        | No hit          | 3000       | CDC2L2 | No hit          | 3000       |
| ABL1(E255K) | No hit          | 3000       | CDK11  | No hit          | 3000       |
| ABL1(F317I) | No hit          | 3000       | CDK2   | No hit          | 3000       |
| ABL1(F317L) | No hit          | 3000       | CDK3   | No hit          | 3000       |
| ABL1(H396P) | No hit          | 3000       | CDK5   | No hit          | 3000       |
| ABL1(M351T) | No hit          | 3000       | CDK7   | No hit          | 3000       |
| ABL1(Q252H) | No hit          | 3000       | CDK8   | No hit          | 3000       |
| ABL1(T315I) | No hit          | 3000       | CDK9   | No hit          | 3000       |
| ABL1(Y253F) | No hit          | 3000       | CDKL2  | No hit          | 3000       |
| ABL2        | No hit          | 3000       | CHEK1  | No hit          | 3000       |
| ACVR1       | No hit          | 3000       | CHEK2  | No hit          | 3000       |
| ACVR1B      | No hit          | 3000       | CIT    | No hit          | 3000       |
| ACVR2A      | No hit          | 3000       | CLK1   | 5.1             | 3000       |
| ACVR2B      | No hit          | 3000       | CLK2   | 30              | 3000       |

|             |        |      |  |          |        |      |
|-------------|--------|------|--|----------|--------|------|
| ACVRL1      | No hit | 3000 |  | CLK3     | No hit | 3000 |
| ADCK3       | No hit | 3000 |  | CLK4     | 10     | 3000 |
| ADCK4       | No hit | 3000 |  | CSF1R    | No hit | 3000 |
| AKT1        | No hit | 3000 |  | CSK      | No hit | 3000 |
| AKT2        | No hit | 3000 |  | CSNK1A1L | No hit | 3000 |
| AKT3        | 23     | 3000 |  | CSNK1D   | No hit | 3000 |
| ALK         | No hit | 3000 |  | CSNK1E   | No hit | 3000 |
| AMPK-alpha1 | No hit | 3000 |  | CSNK1G1  | No hit | 3000 |
| AMPK-alpha2 | No hit | 3000 |  | CSNK1G2  | No hit | 3000 |
| ANKK1       | No hit | 3000 |  | CSNK1G3  | No hit | 3000 |
| ARK5        | No hit | 3000 |  | CSNK2A1  | No hit | 3000 |
| AURKA       | No hit | 3000 |  | CSNK2A2  | No hit | 3000 |
| AURKB       | No hit | 3000 |  | DAPK1    | No hit | 3000 |
| AURKC       | No hit | 3000 |  | DAPK2    | No hit | 3000 |
| AXL         | No hit | 3000 |  | DAPK3    | No hit | 3000 |
| BIKE        | No hit | 3000 |  | DCAMKL1  | No hit | 3000 |
| BLK         | No hit | 3000 |  | DCAMKL2  | No hit | 3000 |
| BMPR1A      | No hit | 3000 |  | DCAMKL3  | No hit | 3000 |
| BMPR1B      | No hit | 3000 |  | DDR1     | No hit | 3000 |
| BMPR2       | No hit | 3000 |  | DDR2     | No hit | 3000 |
| BMX         | No hit | 3000 |  | DLK      | No hit | 3000 |
| BRAF        | No hit | 3000 |  | DMPK     | No hit | 3000 |
| BRAF(V600E) | No hit | 3000 |  | DMPK2    | No hit | 3000 |
| BRSK1       | No hit | 3000 |  | DRAK1    | No hit | 3000 |

|        |        |      |  |                              |        |      |
|--------|--------|------|--|------------------------------|--------|------|
| BRSK2  | No hit | 3000 |  | DRAK2                        | No hit | 3000 |
| BTK    | No hit | 3000 |  | DYRK1B                       | No hit | 3000 |
| CAMK1  | No hit | 3000 |  | EGFR                         | No hit | 3000 |
| CAMK1D | No hit | 3000 |  | EGFR(E746-A750del)           | No hit | 3000 |
| CAMK1G | No hit | 3000 |  | EGFR(G719C)                  | No hit | 3000 |
| CAMK2A | No hit | 3000 |  | EGFR(G719S)                  | No hit | 3000 |
| CAMK2B | No hit | 3000 |  | EGFR(L747-E749del,<br>A750P) | No hit | 3000 |
| CAMK2D | No hit | 3000 |  | EGFR(L747-S752del,<br>P753S) | No hit | 3000 |
| CAMK2G | No hit | 3000 |  | EGFR(L747-<br>T751del,Sins)  | No hit | 3000 |
| CAMK4  | No hit | 3000 |  | EGFR(L858R)                  | No hit | 3000 |
| CAMKK1 | No hit | 3000 |  | EGFR(L861Q)                  | No hit | 3000 |
| CAMKK2 | No hit | 3000 |  | EGFR(S752-I759del)           | No hit | 3000 |
| EPHA1  | No hit | 3000 |  | JAK1(Kin.Dom.1)              | No hit | 3000 |
| EPHA2  | No hit | 3000 |  | JAK1(Kin.Dom.2)              | No hit | 3000 |
| EPHA3  | No hit | 3000 |  | JAK2(Kin.Dom.2)              | No hit | 3000 |
| EPHA4  | No hit | 3000 |  | JAK3(Kin.Dom.2)              | No hit | 3000 |
| EPHA5  | No hit | 3000 |  | JNK1                         | No hit | 3000 |
| EPHA6  | No hit | 3000 |  | JNK2                         | No hit | 3000 |
| EPHA7  | No hit | 3000 |  | JNK3                         | No hit | 3000 |
| EPHA8  | No hit | 3000 |  | KIT                          | No hit | 3000 |
| EPHB1  | No hit | 3000 |  | KIT(D816V)                   | No hit | 3000 |

|              |        |      |                  |        |      |
|--------------|--------|------|------------------|--------|------|
| EPHB2        | No hit | 3000 | KIT(V559D)       | No hit | 3000 |
| EPHB3        | No hit | 3000 | KIT(V559D,T670I) | No hit | 3000 |
| EPHB4        | No hit | 3000 | KIT(V559D,V654A) | No hit | 3000 |
| ERBB2        | No hit | 3000 | LATS1            | No hit | 3000 |
| ERBB4        | No hit | 3000 | LATS2            | 12     | 3000 |
| ERK1         | No hit | 3000 | LCK              | No hit | 3000 |
| ERK2         | No hit | 3000 | LIMK1            | No hit | 3000 |
| ERK3         | No hit | 3000 | LIMK2            | No hit | 3000 |
| ERK4         | No hit | 3000 | LKB1             | No hit | 3000 |
| ERK5         | No hit | 3000 | LOK              | No hit | 3000 |
| ERK8         | No hit | 3000 | LTK              | No hit | 3000 |
| FER          | No hit | 3000 | LYN              | No hit | 3000 |
| FES          | No hit | 3000 | MAP3K3           | No hit | 3000 |
| FGFR1        | No hit | 3000 | MAP3K4           | No hit | 3000 |
| FGFR2        | No hit | 3000 | MAP3K5           | No hit | 3000 |
| FGFR3        | No hit | 3000 | MAP4K1           | No hit | 3000 |
| FGFR3(G697C) | No hit | 3000 | MAP4K2           | No hit | 3000 |
| FGFR4        | No hit | 3000 | MAP4K3           | No hit | 3000 |
| FGR          | No hit | 3000 | MAP4K4           | No hit | 3000 |
| FLT1         | No hit | 3000 | MAP4K5           | No hit | 3000 |
| FLT3         | No hit | 3000 | MAPKAPK2         | No hit | 3000 |
| FLT3(D835H)  | No hit | 3000 | MAPKAPK5         | No hit | 3000 |
| FLT3(D835Y)  | No hit | 3000 | MARK1            | No hit | 3000 |
| FLT3(ITD)    | No hit | 3000 | MARK2            | No hit | 3000 |



|                       |        |      |       |        |      |
|-----------------------|--------|------|-------|--------|------|
| FLT3(K663Q)           | No hit | 3000 | MARK3 | No hit | 3000 |
| FLT3(N841I)           | No hit | 3000 | MARK4 | No hit | 3000 |
| FLT4                  | No hit | 3000 | MEK1  | No hit | 3000 |
| FRK                   | No hit | 3000 | MEK2  | No hit | 3000 |
| FYN                   | No hit | 3000 | MEK3  | No hit | 3000 |
| GAK                   | No hit | 3000 | MEK4  | No hit | 3000 |
| GCN2(Kin.Dom.2,S808G) | No hit | 3000 | MEK6  | No hit | 3000 |
| GSK3A                 | No hit | 3000 | MELK  | No hit | 3000 |
| GSK3B                 | No hit | 3000 | MERTK | No hit | 3000 |
| HCK                   | No hit | 3000 | MET   | No hit | 3000 |
| HIPK1                 | No hit | 3000 | MINK  | No hit | 3000 |
| IGF1R                 | No hit | 3000 | MKNK1 | No hit | 3000 |
| IKK-alpha             | No hit | 3000 | MKNK2 | No hit | 3000 |
| IKK-beta              | No hit | 3000 | MLCK  | No hit | 3000 |
| IKK-epsilon           | No hit | 3000 | MLK1  | No hit | 3000 |
| INSR                  | No hit | 3000 | MLK2  | No hit | 3000 |
| INSRR                 | No hit | 3000 | MLK3  | No hit | 3000 |
| IRAK3                 | No hit | 3000 | MRCKA | No hit | 3000 |
| ITK                   | No hit | 3000 | MRCKB | No hit | 3000 |
| MST1                  | No hit | 3000 | PKN1  | No hit | 3000 |
| MST1R                 | No hit | 3000 | PKN2  | No hit | 3000 |
| MST2                  | No hit | 3000 | PLK1  | No hit | 3000 |
| MST3                  | No hit | 3000 | PLK3  | No hit | 3000 |
| MST4                  | No hit | 3000 | PLK4  | No hit | 3000 |

|           |        |      |            |        |      |
|-----------|--------|------|------------|--------|------|
| MUSK      | No hit | 3000 | PRKCD      | No hit | 3000 |
| MYLK      | No hit | 3000 | PRKCE      | No hit | 3000 |
| MYLK2     | No hit | 3000 | PRKCH      | No hit | 3000 |
| MYO3A     | No hit | 3000 | PRKCQ      | No hit | 3000 |
| MYO3B     | No hit | 3000 | PRKD1      | No hit | 3000 |
| NDR2      | No hit | 3000 | PRKD2      | No hit | 3000 |
| NEK1      | No hit | 3000 | PRKD3      | No hit | 3000 |
| NEK2      | No hit | 3000 | PRKG1      | No hit | 3000 |
| NEK5      | No hit | 3000 | PRKG2      | No hit | 3000 |
| NEK6      | No hit | 3000 | PRKR       | No hit | 3000 |
| NEK7      | No hit | 3000 | PRKX       | No hit | 3000 |
| NEK9      | No hit | 3000 | PTK2       | No hit | 3000 |
| NLK       | No hit | 3000 | PTK2B      | No hit | 3000 |
| p38-alpha | No hit | 3000 | PTK6       | No hit | 3000 |
| p38-beta  | No hit | 3000 | RAF1       | No hit | 3000 |
| p38-delta | No hit | 3000 | RET        | No hit | 3000 |
| p38-gamma | No hit | 3000 | RET(M918T) | No hit | 3000 |
| PAK1      | No hit | 3000 | RET(V804L) | No hit | 3000 |
| PAK2      | No hit | 3000 | RET(V804M) | No hit | 3000 |
| PAK3      | No hit | 3000 | RIOK1      | No hit | 3000 |
| PAK4      | No hit | 3000 | RIOK2      | No hit | 3000 |
| PAK6      | No hit | 3000 | RIOK3      | No hit | 3000 |
| PAK7/PAK5 | No hit | 3000 | RIPK1      | No hit | 3000 |
| PCTK1     | No hit | 3000 | RIPK2      | No hit | 3000 |

|               |        |      |                    |        |      |
|---------------|--------|------|--------------------|--------|------|
| PCTK2         | No hit | 3000 | RIPK4              | No hit | 3000 |
| PCTK3         | No hit | 3000 | ROCK2              | 0.4    | 3000 |
| PDGFRA        | No hit | 3000 | ROS1               | No hit | 3000 |
| PDGFRB        | No hit | 3000 | RPS6KA1(Kin.Dom.1) | No hit | 3000 |
| PDPK1         | No hit | 3000 | RPS6KA1(Kin.Dom.2) | No hit | 3000 |
| PFTAIRE2      | No hit | 3000 | RPS6KA2(Kin.Dom.1) | No hit | 3000 |
| PFTK1         | No hit | 3000 | RPS6KA2(Kin.Dom.2) | No hit | 3000 |
| PHKG1         | No hit | 3000 | RPS6KA3(Kin.Dom.1) | No hit | 3000 |
| PHKG2         | No hit | 3000 | RPS6KA4(Kin.Dom.1) | No hit | 3000 |
| PIK3C2B       | No hit | 3000 | RPS6KA4(Kin.Dom.2) | No hit | 3000 |
| PIK3CA        | No hit | 3000 | RPS6KA5(Kin.Dom.1) | No hit | 3000 |
| PIK3CA(E545K) | No hit | 3000 | RPS6KA5(Kin.Dom.2) | No hit | 3000 |
| PIK3CB        | No hit | 3000 | RPS6KA6(Kin.Dom.1) | No hit | 3000 |
| PIK3CD        | No hit | 3000 | RPS6KA6(Kin.Dom.2) | No hit | 3000 |
| PIK3CG        | No hit | 3000 | SgK085             | No hit | 3000 |
| PIM1          | No hit | 3000 | SgK110             | No hit | 3000 |
| PIM2          | No hit | 3000 | SLK                | No hit | 3000 |
| PIM3          | No hit | 3000 | SNARK              | No hit | 3000 |
| PIP5K1A       | No hit | 3000 | SNF1LK             | No hit | 3000 |
| PIP5K2B       | No hit | 3000 | SNF1LK2            | No hit | 3000 |
| PKAC-alpha    | No hit | 3000 | SRC                | No hit | 3000 |
| PKAC-beta     | No hit | 3000 | SRMS               | No hit | 3000 |
| PKMYT1        | No hit | 3000 | SRPK1              | No hit | 3000 |
| SRPK2         | No hit | 3000 | TRKC               | No hit | 3000 |

---

|        |        |      |                 |        |      |
|--------|--------|------|-----------------|--------|------|
| SRPK3  | No hit | 3000 | TSSK1           | No hit | 3000 |
| STK16  | No hit | 3000 | TTK             | No hit | 3000 |
| STK33  | No hit | 3000 | TXK             | No hit | 3000 |
| STK35  | No hit | 3000 | TYK2(Kin.Dom.1) | No hit | 3000 |
| STK36  | No hit | 3000 | TYK2(Kin.Dom.2) | No hit | 3000 |
| SYK    | No hit | 3000 | TYRO3           | No hit | 3000 |
| TAK1   | No hit | 3000 | ULK1            | No hit | 3000 |
| TAOK1  | No hit | 3000 | ULK2            | No hit | 3000 |
| TAOK3  | No hit | 3000 | ULK3            | No hit | 3000 |
| TEC    | No hit | 3000 | VEGFR2          | No hit | 3000 |
| TESK1  | No hit | 3000 | WEE1            | No hit | 3000 |
| TGFBR1 | No hit | 3000 | WEE2            | No hit | 3000 |
| TGFBR2 | No hit | 3000 | YANK2           | No hit | 3000 |
| TIE1   | No hit | 3000 | YANK3           | No hit | 3000 |
| TIE2   | No hit | 3000 | YES             | No hit | 3000 |
| TLK1   | No hit | 3000 | YSK1            | No hit | 3000 |
| TLK2   | No hit | 3000 | ZAK             | No hit | 3000 |
| TNIK   | No hit | 3000 | ZAP70           | No hit | 3000 |
| TNK1   | No hit | 3000 | TRKA            | No hit | 3000 |
| TNK2   | No hit | 3000 | TRKB            | No hit | 3000 |
| TNNI3K | No hit | 3000 |                 |        |      |

- The scores shown are percentage of enzyme activity relative to that seen in a DMSO control experiment. Assays were scored “no hit” if enzyme activity was statistically indistinct from that observed upon exposure only to a DMSO control.

(5c) Results from counter screening of SR3677 against a panel of 70 non-kinase enzymes and receptors:

| EXPERIMENTAL RESULTS - BIOCHEMICAL ASSAYS |                                            |        |        |    |       |               |      |     |   |    |                  |                |                |   |     |
|-------------------------------------------|--------------------------------------------|--------|--------|----|-------|---------------|------|-----|---|----|------------------|----------------|----------------|---|-----|
| Cat. #                                    | TARGET                                     | BATCH* | SPE    | n= | CONC. | †% INHIBITION |      |     |   |    | IC <sub>50</sub> | K <sub>i</sub> | n <sub>H</sub> | R |     |
|                                           |                                            |        |        |    |       | %             | -100 | -50 | 0 | 50 |                  |                |                |   | 100 |
| 107300                                    | Peptidase, Angiotensin Converting Enzyme   | 208157 | rabbit | 2  | 3 μM  | 1             |      |     |   |    |                  |                |                |   |     |
| 200510                                    | Adenosine A <sub>1</sub>                   | 208162 | hum    | 2  | 3 μM  | -4            |      |     |   |    |                  |                |                |   |     |
| 200610                                    | Adenosine A <sub>2A</sub>                  | 208163 | hum    | 2  | 3 μM  | 5             |      |     |   |    |                  |                |                |   |     |
| 200720                                    | Adenosine A <sub>2</sub>                   | 208165 | hum    | 2  | 3 μM  | -4            |      |     |   |    |                  |                |                |   |     |
| ♦ 203100                                  | Adrenergic α <sub>1A</sub>                 | 208136 | rat    | 2  | 3 μM  | 53            |      |     |   |    |                  |                |                |   |     |
| ♦ 203200                                  | Adrenergic α <sub>1B</sub>                 | 208137 | rat    | 2  | 3 μM  | 68            |      |     |   |    |                  |                |                |   |     |
| 203400                                    | Adrenergic α <sub>1C</sub>                 | 208139 | hum    | 2  | 3 μM  | 43            |      |     |   |    |                  |                |                |   |     |
| ♦ 203620                                  | Adrenergic α <sub>2A</sub>                 | 208140 | hum    | 2  | 3 μM  | 76            |      |     |   |    |                  |                |                |   |     |
| 204010                                    | Adrenergic β <sub>1</sub>                  | 208169 | hum    | 2  | 3 μM  | 43            |      |     |   |    |                  |                |                |   |     |
| 204110                                    | Adrenergic β <sub>2</sub>                  | 208170 | hum    | 2  | 3 μM  | 19            |      |     |   |    |                  |                |                |   |     |
| 285010                                    | Androgen (Testosterone) AR                 | 207809 | rat    | 2  | 3 μM  | 10            |      |     |   |    |                  |                |                |   |     |
| 210020                                    | Angiotensin AT <sub>1</sub>                | 208052 | hum    | 2  | 3 μM  | -1            |      |     |   |    |                  |                |                |   |     |
| 210110                                    | Angiotensin AT <sub>2</sub>                | 208054 | hum    | 2  | 3 μM  | -1            |      |     |   |    |                  |                |                |   |     |
| 212510                                    | Bradykinin B <sub>1</sub>                  | 208111 | hum    | 2  | 3 μM  | -3            |      |     |   |    |                  |                |                |   |     |
| 212610                                    | Bradykinin B <sub>2</sub>                  | 208113 | hum    | 2  | 3 μM  | -18           |      |     |   |    |                  |                |                |   |     |
| 214510                                    | Calcium Channel L-Type, Benzothiazepine    | 208032 | rat    | 2  | 3 μM  | 47            |      |     |   |    |                  |                |                |   |     |
| 214600                                    | Calcium Channel L-Type, Dihydropyridine    | 208126 | rat    | 2  | 3 μM  | 24            |      |     |   |    |                  |                |                |   |     |
| 216000                                    | Calcium Channel N-Type                     | 208037 | rat    | 2  | 3 μM  | -6            |      |     |   |    |                  |                |                |   |     |
| 219500                                    | Dopamine D <sub>1</sub>                    | 208175 | hum    | 2  | 3 μM  | 17            |      |     |   |    |                  |                |                |   |     |
| 219700                                    | Dopamine D <sub>2S</sub>                   | 208177 | hum    | 2  | 3 μM  | 6             |      |     |   |    |                  |                |                |   |     |
| 219800                                    | Dopamine D <sub>3</sub>                    | 208179 | hum    | 2  | 3 μM  | 15            |      |     |   |    |                  |                |                |   |     |
| 219900                                    | Dopamine D <sub>4L</sub>                   | 208181 | hum    | 2  | 3 μM  | -2            |      |     |   |    |                  |                |                |   |     |
| 224010                                    | Endothelin ET <sub>A</sub>                 | 208073 | hum    | 2  | 3 μM  | 1             |      |     |   |    |                  |                |                |   |     |
| 224110                                    | Endothelin ET <sub>B</sub>                 | 208075 | hum    | 2  | 3 μM  | -1            |      |     |   |    |                  |                |                |   |     |
| 225510                                    | Epidermal Growth Factor (EGF)              | 208077 | hum    | 2  | 3 μM  | -1            |      |     |   |    |                  |                |                |   |     |
| 226010                                    | Estrogen ERα                               | 208081 | hum    | 2  | 3 μM  | -2            |      |     |   |    |                  |                |                |   |     |
| 226300                                    | G Protein-Coupled Receptor GPR103          | 208027 | hum    | 2  | 3 μM  | 25            |      |     |   |    |                  |                |                |   |     |
| 226600                                    | GABA <sub>A</sub> , Flunitrazepam, Central | 208186 | rat    | 2  | 3 μM  | -18           |      |     |   |    |                  |                |                |   |     |
| 226500                                    | GABA <sub>A</sub> , Muscimol, Central      | 208141 | rat    | 2  | 3 μM  | 5             |      |     |   |    |                  |                |                |   |     |
| 226810                                    | GABA <sub>A</sub>                          | 208090 | hum    | 2  | 3 μM  | 4             |      |     |   |    |                  |                |                |   |     |

## EXPERIMENTAL RESULTS - BIOCHEMICAL ASSAYS

| Cat. # | TARGET                                             | BATCH* | SPP    | n= | CONC. | ↑% INHIBITION |      |     |   |    | IC <sub>50</sub> | K <sub>i</sub> | n <sub>H</sub> | R |
|--------|----------------------------------------------------|--------|--------|----|-------|---------------|------|-----|---|----|------------------|----------------|----------------|---|
|        |                                                    |        |        |    |       | %             | -100 | -50 | 0 | 50 |                  |                |                |   |
| 232700 | Glutamate, Kainate                                 | 208189 | rat    | 2  | 3 μM  | -11           |      |     |   |    |                  |                |                |   |
| 232810 | Glutamate, NMDA, Agonism                           | 208190 | rat    | 2  | 3 μM  | -4            |      |     |   |    |                  |                |                |   |
| 232910 | Glutamate, NMDA, Glycine                           | 208191 | rat    | 2  | 3 μM  | -10           |      |     |   |    |                  |                |                |   |
| 233000 | Glutamate, NMDA, Phencyclidine                     | 208192 | rat    | 2  | 3 μM  | -2            |      |     |   |    |                  |                |                |   |
| 239610 | Histamine H <sub>1</sub>                           | 208195 | hum    | 2  | 3 μM  | 7             |      |     |   |    |                  |                |                |   |
| 239710 | Histamine H <sub>2</sub>                           | 208196 | hum    | 2  | 3 μM  | 1             |      |     |   |    |                  |                |                |   |
| 239810 | Histamine H <sub>3</sub>                           | 207911 | hum    | 2  | 3 μM  | -2            |      |     |   |    |                  |                |                |   |
| 241000 | Imidazoline I <sub>2</sub> , Central               | 208129 | rat    | 2  | 3 μM  | 14            |      |     |   |    |                  |                |                |   |
| 243510 | Interleukin IL-1                                   | 207950 | mouze  | 2  | 3 μM  | -2            |      |     |   |    |                  |                |                |   |
| 250460 | Leukotriene, Cysteinyl CysLT <sub>1</sub>          | 207922 | hum    | 2  | 3 μM  | 0             |      |     |   |    |                  |                |                |   |
| 251600 | Melatonin MT <sub>1</sub>                          | 207927 | hum    | 2  | 3 μM  | 7             |      |     |   |    |                  |                |                |   |
| 252610 | Muscarinic M <sub>1</sub>                          | 208208 | hum    | 2  | 3 μM  | 6             |      |     |   |    |                  |                |                |   |
| 252710 | Muscarinic M <sub>2</sub>                          | 208209 | hum    | 2  | 3 μM  | 4             |      |     |   |    |                  |                |                |   |
| 252810 | Muscarinic M <sub>3</sub>                          | 208210 | hum    | 2  | 3 μM  | 3             |      |     |   |    |                  |                |                |   |
| 257010 | Neuropeptide Y Y <sub>1</sub>                      | 208219 | hum    | 2  | 3 μM  | -8            |      |     |   |    |                  |                |                |   |
| 257110 | Neuropeptide Y Y <sub>2</sub>                      | 208221 | hum    | 2  | 3 μM  | 0             |      |     |   |    |                  |                |                |   |
| 258590 | Nicotinic Acetylcholine                            | 208028 | hum    | 2  | 3 μM  | 12            |      |     |   |    |                  |                |                |   |
| 258700 | Nicotinic Acetylcholine α1, Bungarotoxin           | 208029 | hum    | 2  | 3 μM  | 7             |      |     |   |    |                  |                |                |   |
| 260110 | Opiate δ (OP1, DOP)                                | 208229 | hum    | 2  | 3 μM  | -9            |      |     |   |    |                  |                |                |   |
| 260210 | Opiate κ (OP2, KOP)                                | 208230 | hum    | 2  | 3 μM  | -7            |      |     |   |    |                  |                |                |   |
| 260410 | Opiate μ (OP3, MOP)                                | 208231 | hum    | 2  | 3 μM  | 5             |      |     |   |    |                  |                |                |   |
| 264500 | Phorbol Ester                                      | 208038 | mouze  | 2  | 3 μM  | 10            |      |     |   |    |                  |                |                |   |
| 265010 | Platelet Activating Factor (PAF)                   | 208217 | hum    | 2  | 3 μM  | -4            |      |     |   |    |                  |                |                |   |
| 265800 | Potassium Channel [K <sub>v</sub> ]                | 208224 | ham    | 2  | 3 μM  | 2             |      |     |   |    |                  |                |                |   |
| 265900 | Potassium Channel hERG                             | 208134 | hum    | 2  | 3 μM  | 31            |      |     |   |    |                  |                |                |   |
| 268410 | Prostanoid EP <sub>4</sub>                         | 208215 | hum    | 2  | 3 μM  | 5             |      |     |   |    |                  |                |                |   |
| 268700 | Purinergic P <sub>2U</sub>                         | 207821 | rabbit | 2  | 3 μM  | 4             |      |     |   |    |                  |                |                |   |
| 268810 | Purinergic P <sub>2Y</sub>                         | 207823 | rat    | 2  | 3 μM  | 0             |      |     |   |    |                  |                |                |   |
| 270000 | Rolipram                                           | 208135 | rat    | 2  | 3 μM  | -1            |      |     |   |    |                  |                |                |   |
| 271110 | Serotonin (5-Hydroxytryptamine) 5-HT <sub>1A</sub> | 207915 | hum    | 2  | 3 μM  | 6             |      |     |   |    |                  |                |                |   |

## EXPERIMENTAL RESULTS - BIOCHEMICAL ASSAYS

| Cat. # | TARGET                                              | BATCH* | SPE | n= | CONC. | ↑% INHIBITION |      |     |   |    | IC <sub>50</sub> | K <sub>i</sub> | n <sub>H</sub> | R |
|--------|-----------------------------------------------------|--------|-----|----|-------|---------------|------|-----|---|----|------------------|----------------|----------------|---|
|        |                                                     |        |     |    |       | %             | -100 | -50 | 0 | 50 |                  |                |                |   |
| 271910 | Serotonin (5-Hydroxytryptamine) 5-HT <sub>2</sub>   | 208130 | hum | 2  | 3 μM  | 2             |      |     |   |    |                  |                |                |   |
| 278110 | Sigma σ <sub>1</sub>                                | 208142 | hum | 2  | 3 μM  | -18           |      |     |   |    |                  |                |                |   |
| 278200 | Sigma σ <sub>2</sub>                                | 208144 | rat | 2  | 3 μM  | -4            |      |     |   |    |                  |                |                |   |
| 279510 | Sodium Channel, Site 2                              | 208133 | rat | 2  | 3 μM  | 22            |      |     |   |    |                  |                |                |   |
| 255510 | Tachykinin NK <sub>1</sub>                          | 208104 | hum | 2  | 3 μM  | -6            |      |     |   |    |                  |                |                |   |
| 285900 | Thyroid Hormone                                     | 208282 | rat | 2  | 3 μM  | -1            |      |     |   |    |                  |                |                |   |
| 220320 | Transporter, Dopamine (DAT)                         | 208023 | hum | 2  | 3 μM  | 37            |      |     |   |    |                  |                |                |   |
| 228400 | Transporter, GABA                                   | 208085 | rat | 2  | 3 μM  | 17            |      |     |   |    |                  |                |                |   |
| 204410 | Transporter, Norepinephrine (NET)                   | 208021 | hum | 2  | 3 μM  | 16            |      |     |   |    |                  |                |                |   |
| 274030 | Transporter, Serotonin (5-Hydroxytryptamine) (SERT) | 208026 | hum | 2  | 3 μM  | 3             |      |     |   |    |                  |                |                |   |

<sup>1</sup> Testino, S. A., Jr.; Patonay, G. High-throughput inhibition screening of major human cytochrome P450 enzymes using an in vitro cocktail and liquid chromatography-tandem mass spectrometry. *J. Pharm. Biomed. Anal.* **2003**, *30*, 1459-1467.
